# Supplementary material for: Textural, Sensory and Volatile Compounds Analyses in Formulations of Sausages Analogue Elaborated with Edible Mushrooms and Soy Protein Isolate as Meat Substitute
Source: MDPI journal article supplement (doi:10.3390/foods11010052), 2021-12-27
Supplement: s1 [file s1]

# **Textural, sensory and volatile compounds analyses in formula-tions of sausages analogue elaborated with edible mushrooms and soy protein isolate as meat substitute**

**Xinyue Yuan, Wei Jiang, Dianwei Zhang, Huilin Liu\*, and Baoguo Sun**

*Beijing Advanced Innovation Center for Food Nutrition and Human Health, Beijing Engineering and Technology Research Center of Food Additives, Beijing Technology and Business University, 11 Fucheng Road, Beijing, 100048, China.*

\* Corresponding author:

Corresponding author: Huilin Liu

Tel: (86 10) 68984857;

Fax: (86 10) 68984003;

Email: [liuhuilin@btbu.edu.cn](mailto:liuhuilin@btbu.edu.cn) (Huilin Liu)

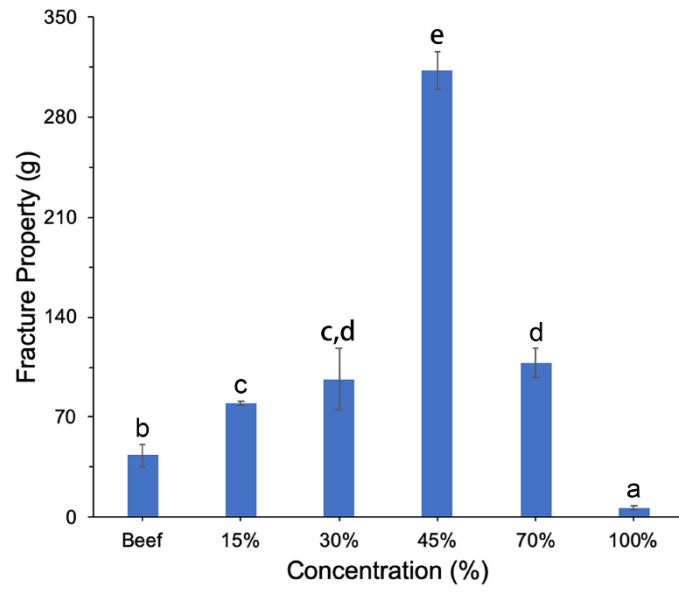

Figure S1 Fracture properties of meat analogues

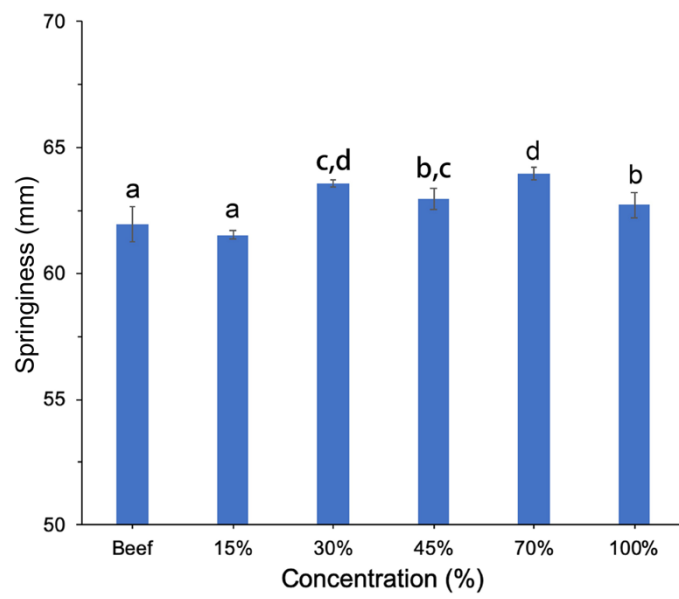

Figure S2 Springiness of meat analogues

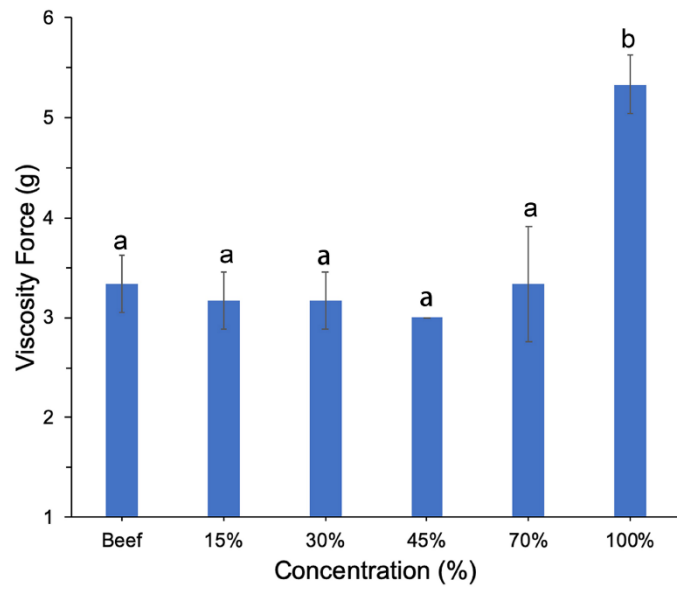

Figure S3 Viscosity of meat analogues

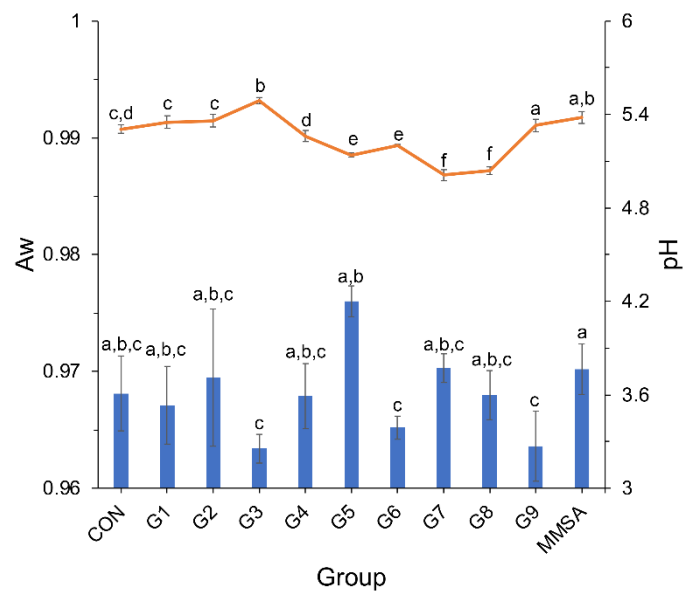

Figure S4 The  $a_w$  and pH of uncooked meat sausage analogues

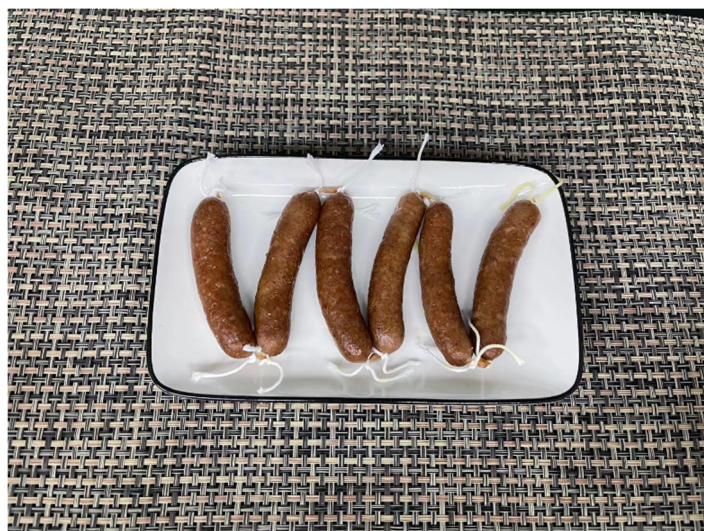

Figure S5 The picture of MMSA taken by a camera under sunlight.

Table S1. Changes in L\*, a\*, b\* values of sausage analogues.

| Treatments | L*                    | a*                | b*             |
|------------|-----------------------|-------------------|----------------|
| Control    | 41.66 ± 0.31          | 6.78 ± 0.06       | 16.44 ± 0.17   |
| G1         | 38.76 ± 0.30          | 8.72 ± 0.16       | 13.89 ± 0.34   |
| G2         | 38.94 ± 0.51          | 10.83 ± 0.21      | 13.48 ± 0.47   |
| G3         | 39.29 ± 0.34          | 13.89 ± 0.23      | 17.08 ± 0.26   |
| G4         | 33.46 ± 0.58          | 12.24 ± 0.47      | 16.02 ± 0.55   |
| G5         | 39.60 ± 0.30          | 11.69 ± 0.32      | 15.76 ± 0.17   |
| G6         | 38.90 ± 0.31          | 11.25 ± 0.30      | 14.40 ± 0.35   |
| G7         | 41.50 ± 0.09          | 11.71 ± 0.08      | 17.36 ± 0.15   |
| G8         | 33.62 ± 0.52          | 9.73 ± 0.11       | 14.09 ± 0.16   |
| G9         | 43.89 ± 0.35          | 12.50 ± 0.22      | 19.59 ± 0.08   |
| MMSA       | 36.53 ± 0.04          | 20.50 ± 0.06      | 16.59 ± 0.07   |
| Treatments | Pre-cooked weight (g) | Cooked weight (g) | Cook yield (%) |



Table S2 Sensory analysis of key factors at different level.

| Treatments | Egg white powder | Meat flavour powder | Oil     | Red yeast rice | Scores |
|------------|------------------|---------------------|---------|----------------|--------|
| Control    | 0                | 0                   | 0       | 0              | 28.03  |
| 1          | 1 (3%)           | 1 (0.1%)            | 1 (17%) | 1 (0.01%)      | 30.97  |
| 2          | 1 (3%)           | 2 (0.2%)            | 2 (19%) | 2 (0.02%)      | 32.1   |
| 3          | 1 (3%)           | 3 (0.3%)            | 3 (21%) | 3 (0.03%)      | 35.61  |
| 4          | 2 (4%)           | 1 (0.1%)            | 2 (19%) | 3 (0.03%)      | 39.55  |
| 5          | 2 (4%)           | 2 (0.2%)            | 3 (21%) | 1 (0.01%)      | 29.45  |
| 6          | 2 (4%)           | 3 (0.3%)            | 1 (17%) | 2 (0.02%)      | 33.45  |
| 7          | 3 (5%)           | 1 (0.1%)            | 3 (21%) | 2 (0.02%)      | 34.97  |
| 8          | 3 (5%)           | 2 (0.2%)            | 1 (17%) | 3 (0.03%)      | 37.42  |
| 9          | 3 (5%)           | 3 (0.3%)            | 2 (19%) | 1 (0.01%)      | 33.87  |
| I          | 98.68            | 105.49              | 101.84  | 94.29          |        |
| II         | 102.45           | 98.97               | 105.52  | 100.52         |        |
| III        | 106.26           | 102.93              | 98.93   | 112.58         |        |
| K1j        | 32.89            | 35.16               | 33.95   | 31.43          |        |
| K2j        | 34.15            | 32.99               | 35.17   | 37.97          |        |
| K3j        | 35.42            | 34.31               | 32.98   | 37.53          |        |
| R          | 2.53             | 2.17                | 2.19    | 6.54           |        |

Table S3. Cook yield of sausage analogues.

| Treatments | Pre-cooked weight (g) | Cooked weight (g) | Cook yield (%) |
|------------|-----------------------|-------------------|----------------|
| Control    | 20.45                 | 21.48             | 105.04         |
| G1         | 21.08                 | 21.88             | 103.80         |
| G2         | 19.50                 | 20.08             | 102.99         |
| G3         | 20.11                 | 20.50             | 101.93         |
| G4         | 20.02                 | 20.62             | 103.02         |
| G5         | 18.67                 | 19.05             | 102.05         |
| G6         | 19.94                 | 20.18             | 101.22         |
| G7         | 21.85                 | 22.14             | 101.33         |
| G8         | 20.70                 | 22.12             | 106.89         |
| G9         | 20.47                 | 21.66             | 105.82         |
| MMSA       | 20.31                 | 21.02             | 103.50         |
